# Supplementary material
Source: publisher figshare collection journal article supplement (https://acs.figshare.com/ndownloader/files/3710914)
Supplement: Supplementary file 1 [file 3710914]

## Supplementary Information

### Membrane Inspired Acidically Stable Dye-Sensitized Photocathode for Solar Fuel Production

Kevin A. Click<sup>†</sup>, Damian R Beauchamp<sup>†</sup>, Zhongjie Huang<sup>†</sup>, Weilin Chen<sup>‡</sup>, and Yiying Wu<sup>\*†</sup>

<sup>†</sup>Department of Chemistry and Biochemistry, The Ohio State University, 100 West 18th Avenue, Columbus, Ohio, 43210, United States

<sup>‡</sup>Key Laboratory of Polyoxometalate Science of Ministry of Education, Department of Chemistry, Northeast Normal University, Changchun, Jilin 130024, China

#### Supplementary Figures

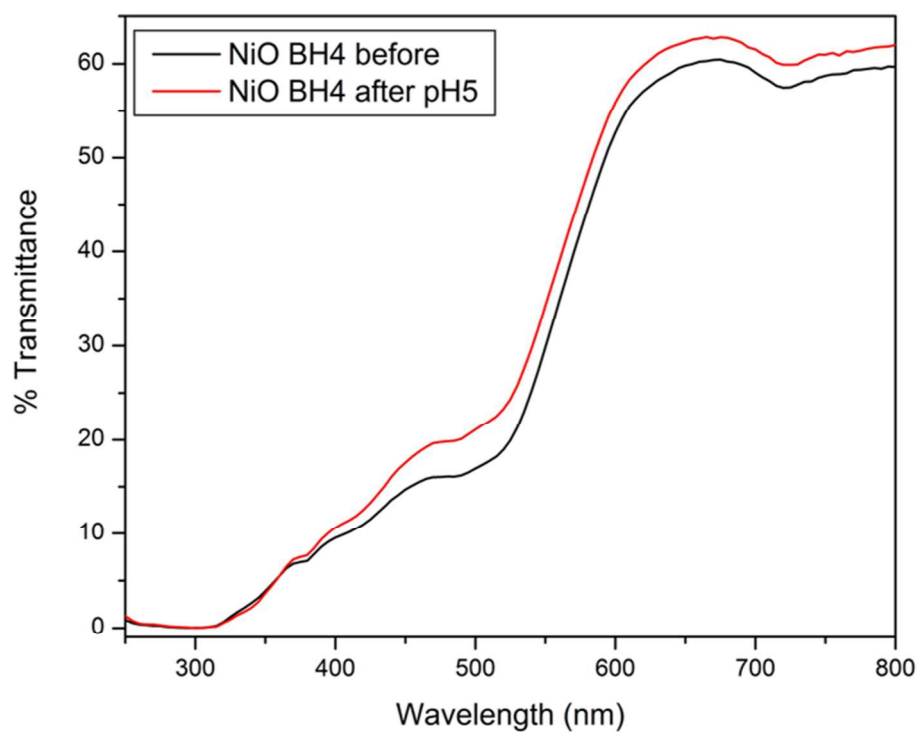

Figure S1. Sensitized BH<sub>4</sub> NiO film before and after 2.7 hours of light chopped chronoamperometry at an applied potential of 0 V vs. NHE in a pH 5 citric acid / citrate buffer with 5mM [Mo<sub>3</sub>S<sub>4</sub>]<sup>4+</sup>

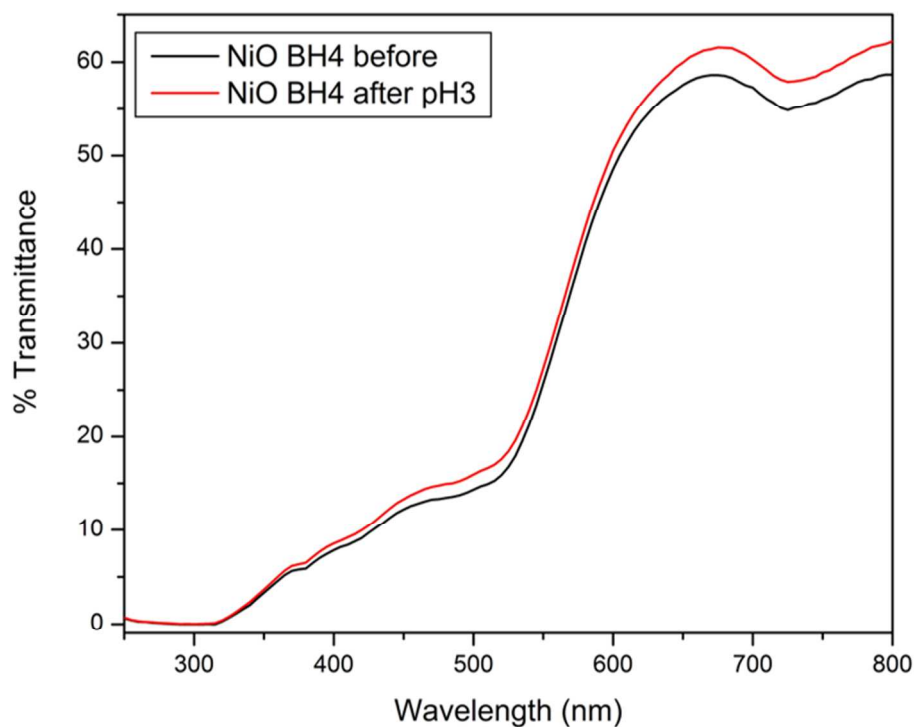

Figure S2. Sensitized BH<sub>4</sub> NiO film before and after 2.8 hours of light chopped chronoamperometry at an applied potential of 0 v vs. NHE in a pH 3 citric acid / citrate buffer with 5mM [Mo<sub>3</sub>S<sub>4</sub>]<sup>4+</sup>.

| Solution                       | Ni (ppm) |
|--------------------------------|----------|
| pH 3 Buffer                    | < 0.25   |
| Bare NiO                       | 1.2      |
| BH <sub>4</sub> Sensitized NiO | < 0.25   |

Table S1. ICP-OES results for 3 hour soak in pH 3 citrate/citric acid buffer of a bare NiO film and a BH<sub>4</sub> sensitized NiO film.

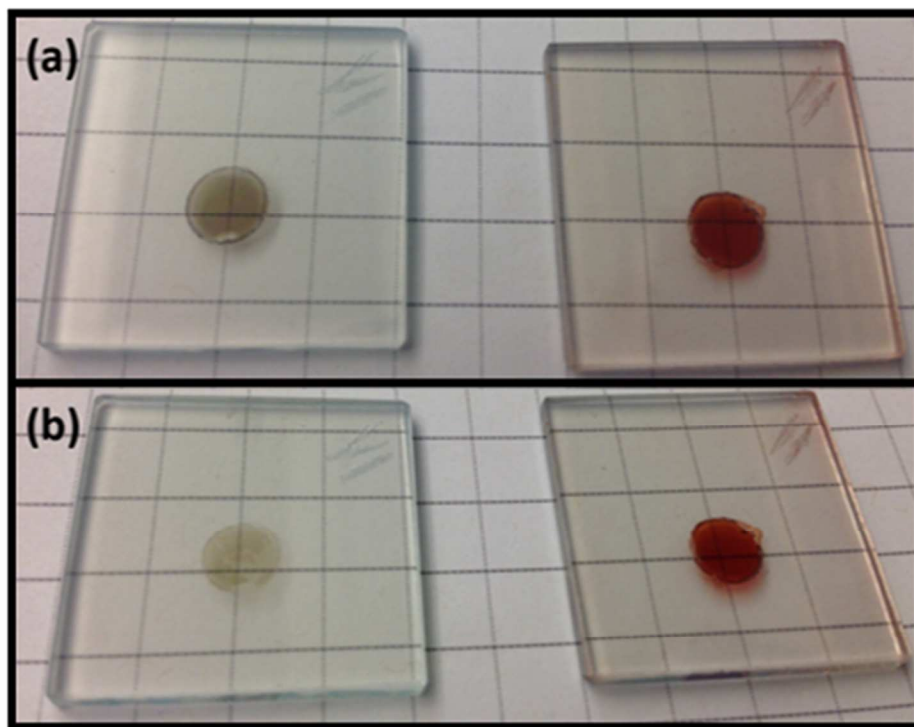

Figure S3. Bare NiO (left) and sensitized BH<sub>4</sub> NiO films (right) before (a) and after (b) soaking in a pH 3 citric acid / citrate buffer for 2.75 hours.

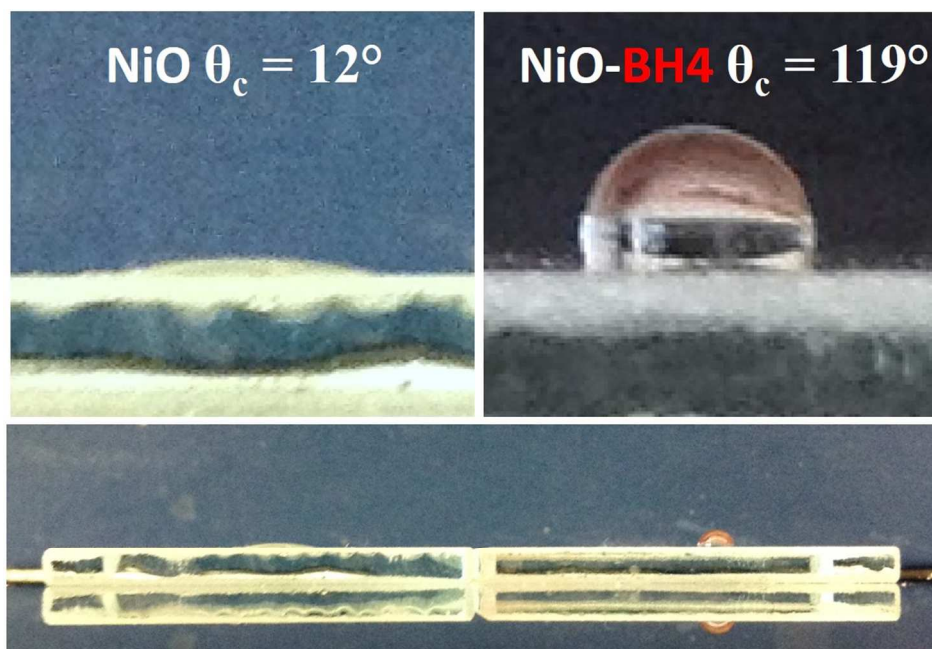

Figure S4. Contact angles for pH 0 (1M HCl) drop on bare NiO (left,  $\theta_c = 12^\circ$ ) and a BH<sub>4</sub> sensitized NiO film (right,  $\theta_c = 119^\circ$ ).

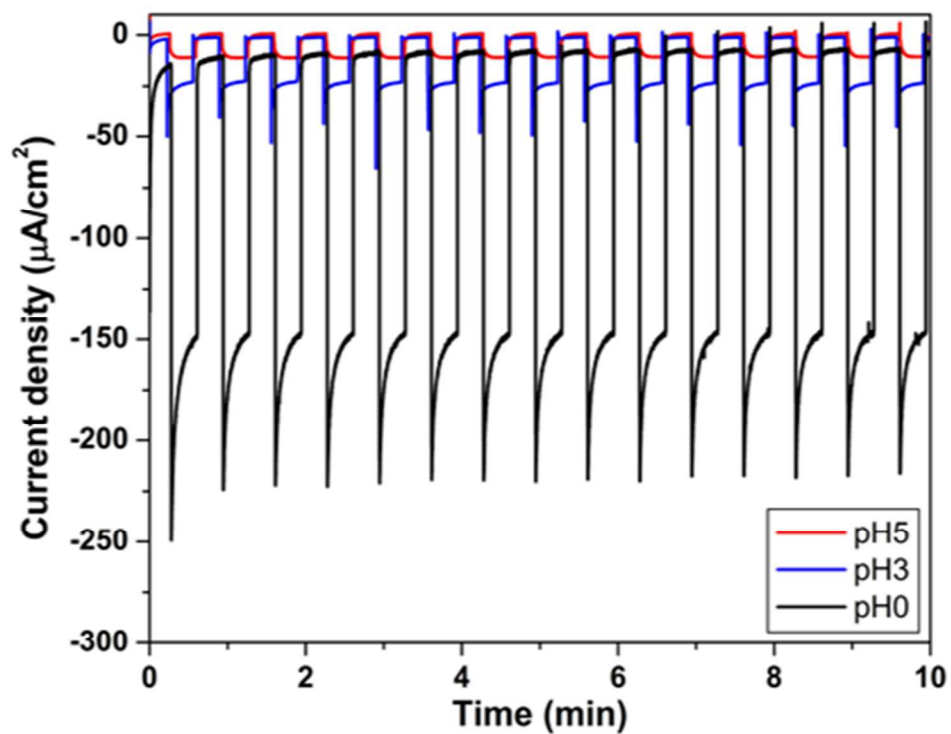

Fig. S5. Chronoamperometry of pH 5, 3 and 0 solutions all with 5mM  $[\text{Mo}_3\text{S}_4]^{4+}$  at an applied potential of 0 V vs. NHE.

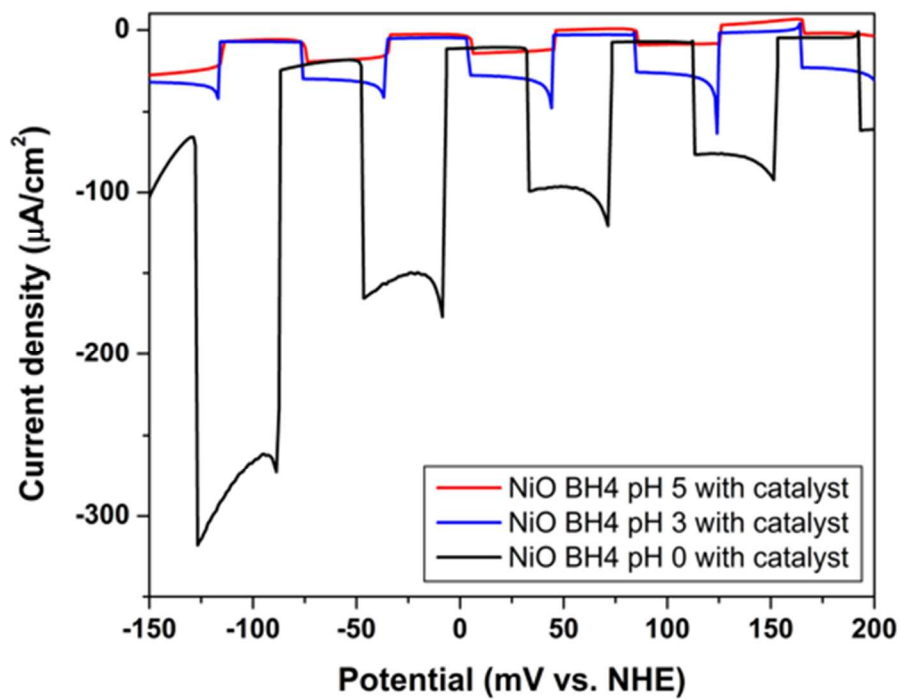

Fig. S6. Linear Sweep Voltammetry of pH 5, 3 and 0 solutions all with 5 mM  $[\text{Mo}_3\text{S}_4]^{4+}$  at an applied potential of 0 V vs. NHE with light chopping.

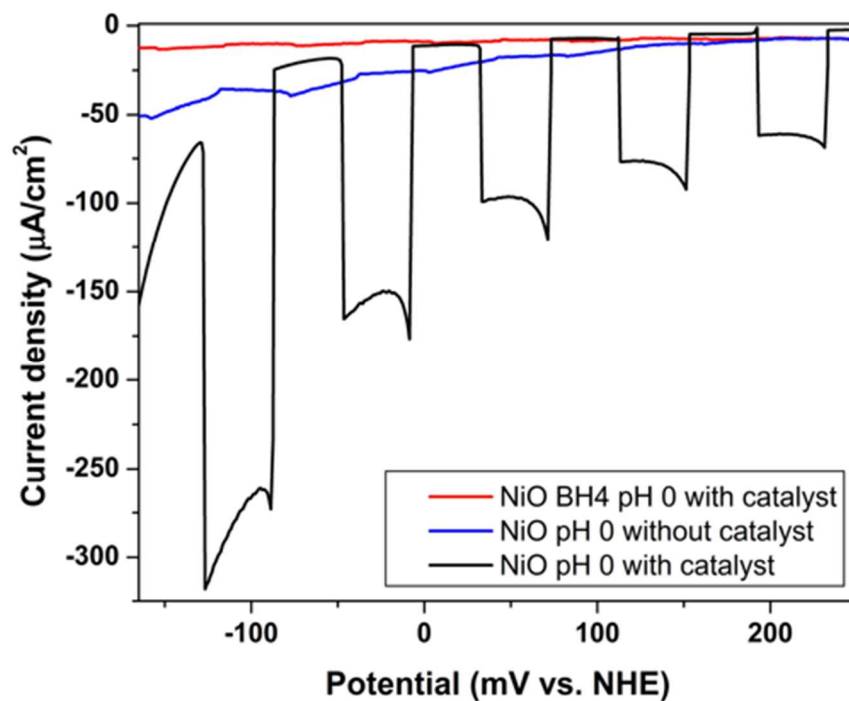

Fig. S7. Linear Sweep Voltammetry with light chopping of all pH 0 (1M HCl) solutions: BH<sub>4</sub> sensitized NiO with 5 mM [Mo<sub>3</sub>S<sub>4</sub>]<sup>4+</sup> (black trace). Bare NiO without [Mo<sub>3</sub>S<sub>4</sub>]<sup>4+</sup> (red trace). Bare NiO with 5 mM [Mo<sub>3</sub>S<sub>4</sub>]<sup>4+</sup> (blue trace).

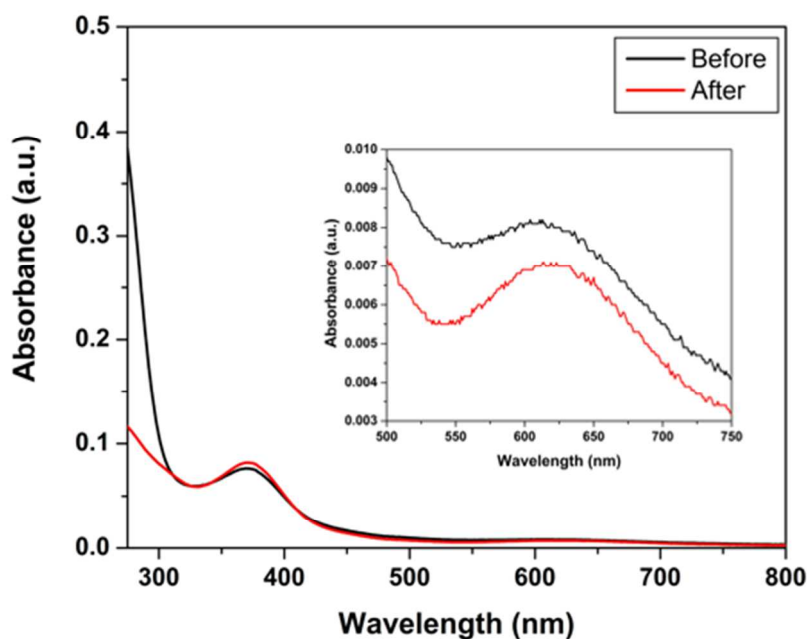

Figure S8. UV-Vis of the [Mo<sub>3</sub>S<sub>4</sub>]<sup>4+</sup> cluster before (black trace) and after (red trace) a 2.7 hour chronoamperometry experiment with constant light illumination held at 0 V vs NHE. Inset: A zoomed view of the absorption peak at 610 nm.

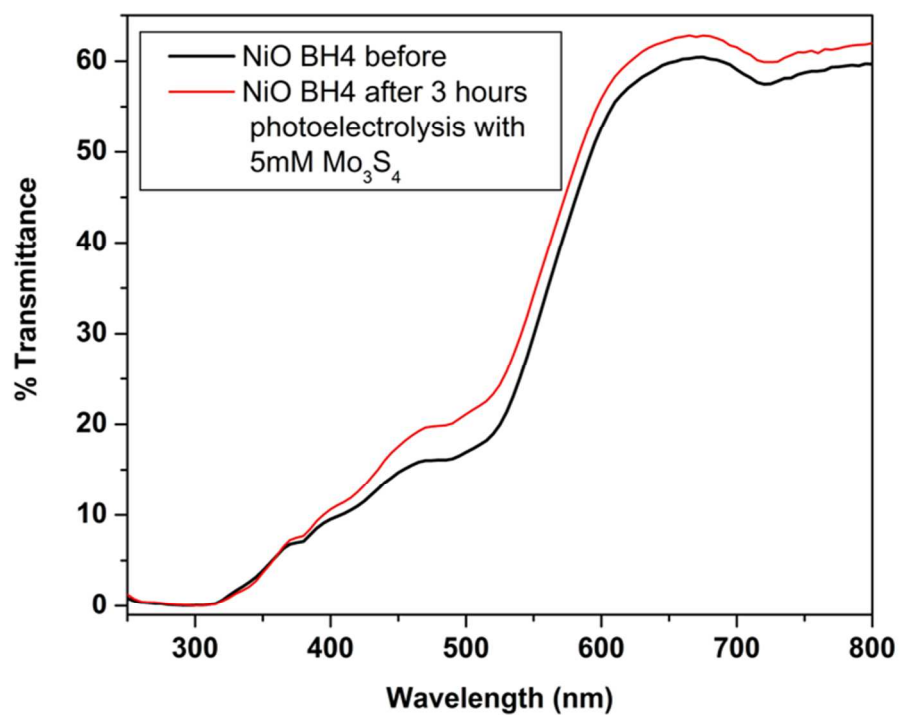

Figure S9. Transmittance of a BH<sub>4</sub> sensitized NiO film before (black trace) and after (red trace) 3 hours of photoelectrolysis of a pH 0 (1M HCl) solution with 5 mM [Mo<sub>3</sub>S<sub>4</sub>]<sup>4+</sup> at an applied potential of 0 V vs. NHE.

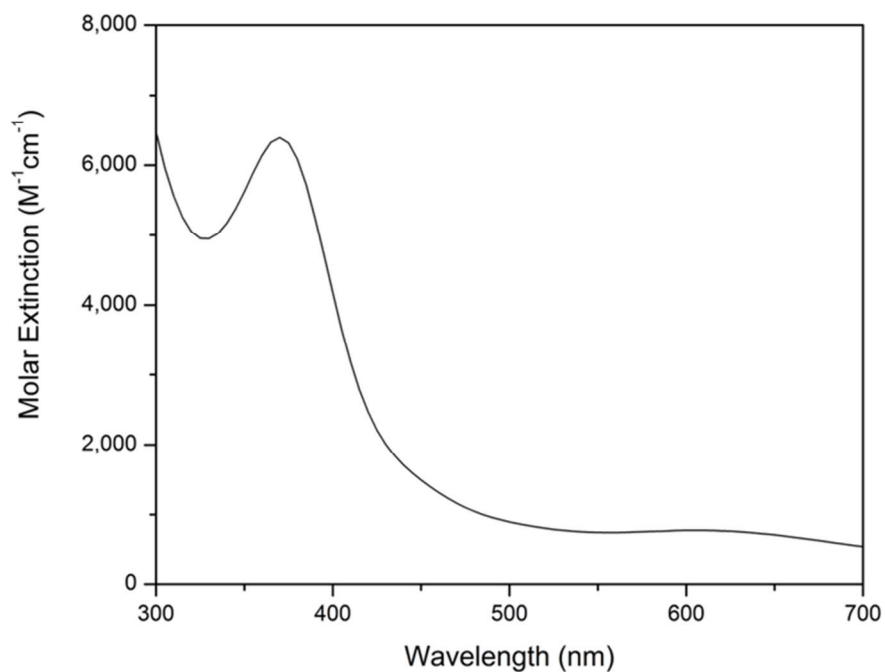

Characterization of [(Mo<sub>3</sub>S<sub>4</sub>)(H<sub>2</sub>O)<sub>9</sub>]Cl<sub>4</sub>

Figure S10. UV-Vis of [(Mo<sub>3</sub>S<sub>4</sub>)(H<sub>2</sub>O)<sub>9</sub>]Cl<sub>4</sub> in 2M HCl.

| Trials             | Current Density ( $\mu\text{A}/\text{cm}^2$ ) |          |
|--------------------|-----------------------------------------------|----------|
|                    | All Data                                      | 95% C.I. |
| 1                  | 139                                           |          |
| 2                  | 146                                           |          |
| 3                  | 150                                           |          |
| 4                  | 171                                           | 171      |
| 5                  | 171                                           | 171      |
| 6                  | 178                                           | 178      |
| 7                  | 192                                           | 192      |
| 8                  | 210                                           |          |
| 9                  | 214                                           |          |
| 10                 | 254                                           |          |
| Average            | 183                                           | 178      |
| Standard Deviation | 36                                            | 10       |

Table S2: Current densities of 10 experiments of  $\text{BH}_4$  sensitized NiO films with 5 mM  $[\text{Mo}_3\text{S}_4]^{4+}$  in pH = 0 electrolyte (1M HCl) at an applied potential of 0 V vs. NHE with a 300 W xenon lamp. The confidence interval (C.I.) at 95% is defined based upon the total trials, average, and standard deviation.

#### IPCE (Incident Photon to Current Efficiency)

The IPCE was calculated using the equation shown below where the light current was monitored at an applied potential of -0.170 V vs NHE while illuminating a  $\text{BH}_4$  sensitized NiO Film with 5mM  $[\text{Mo}_3\text{S}_4]^{4+}$  in pH = 0 (1M HCl) electrolyte with a ModuLight-Module from Ivium Technologies that contains 6 LEDs with wavelengths 460, 525, 590, 623, 660, 740 nm. The power density of the LEDs were determined using a optical power meter (model 1916-C) from Newport optics.

$$IPCE \% = \left( \frac{1240 \times J_{\text{Photocurrent}} \left( \frac{\text{mA}}{\text{cm}^2} \right)}{\text{Wavelength (nm)} \times I_{\text{Photon Power}} \left( \frac{\text{mW}}{\text{cm}^2} \right)} \right) \times 100$$

Where  $J_{\text{photocurrent}}$  is the photocurrent density measured at a specified wavelength,  $I_{\text{Photon Power}}$  is the incident power density at a specified wavelength.

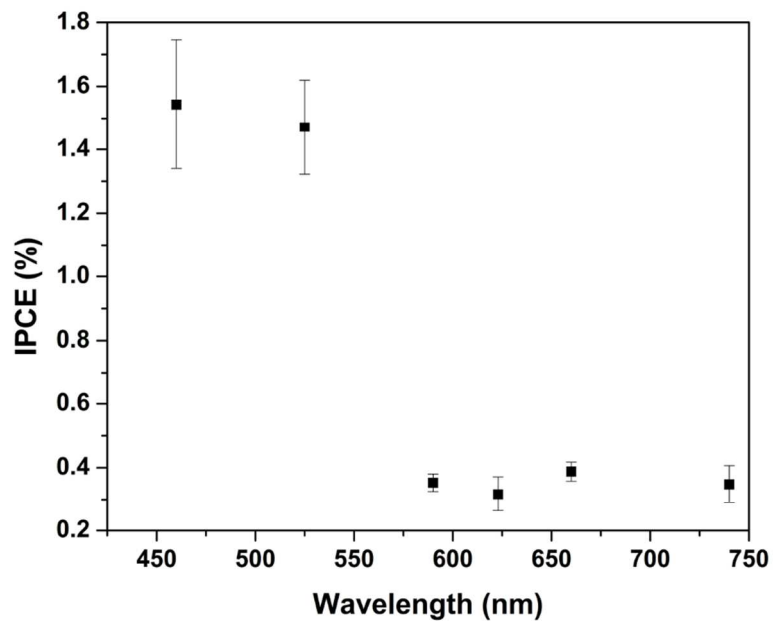

Figure S11. IPCE spectra of a BH<sub>4</sub> sensitized NiO Film with 5mM [Mo<sub>3</sub>S<sub>4</sub>]<sup>4+</sup> in pH = 0 (1M HCl) electrolyte at an applied potential of - 0.17 V vs NHE.

| Wavelength | IPCE (%)     |
|------------|--------------|
| 460        | 1.54 ± 0.20  |
| 525        | 1.47 ± 0.15  |
| 590        | 0.35 ± 0.027 |
| 623        | 0.32 ± 0.054 |
| 660        | 0.39 ± 0.030 |
| 740        | 0.35 ± 0.059 |

Table S3. Summary of IPCE results



| Wavelength (nm) | Current ( $\mu\text{A}$ ) | Current ( $\mu\text{A}/\text{cm}^2$ ) | Power (mW) | Power ( $\text{mW}/\text{cm}^2$ ) | IPCE (%) |
|-----------------|---------------------------|---------------------------------------|------------|-----------------------------------|----------|
| Trial #1        |                           |                                       |            |                                   |          |
| 460             | 41.10                     | 0.14679                               | 62         | 24                                | 1.62     |
| 525             | 19.67                     | 0.07025                               | 32         | 13                                | 1.32     |
| 590             | 11.77                     | 0.04204                               | 59         | 23                                | 0.38     |
| 623             | 8.82                      | 0.03150                               | 45         | 18                                | 0.35     |
| 660             | 9.86                      | 0.03521                               | 44         | 17                                | 0.38     |
| 740             | 6.55                      | 0.02339                               | 35         | 14                                | 0.28     |
| Trial #2        |                           |                                       |            |                                   |          |
| 460             | 42.98                     | 0.15350                               | 62         | 24                                | 1.70     |
| 525             | 24.10                     | 0.08607                               | 32         | 13                                | 1.61     |
| 590             | 10.07                     | 0.03596                               | 59         | 23                                | 0.33     |
| 623             | 6.34                      | 0.02264                               | 45         | 18                                | 0.25     |
| 660             | 9.32                      | 0.03329                               | 44         | 17                                | 0.36     |
| 740             | 8.22                      | 0.02936                               | 35         | 14                                | 0.36     |
| Trial #3        |                           |                                       |            |                                   |          |
| 460             | 33.28                     | 0.11886                               | 62         | 24                                | 1.31     |
| 525             | 22.14                     | 0.07907                               | 32         | 13                                | 1.48     |
| 590             | 10.92                     | 0.03900                               | 59         | 23                                | 0.35     |
| 623             | 8.52                      | 0.03043                               | 45         | 18                                | 0.34     |
| 660             | 10.84                     | 0.03871                               | 44         | 17                                | 0.42     |
| 740             | 9.25                      | 0.03304                               | 35         | 14                                | 0.40     |

Table S4. Data to determine the average IPCE%.
